# Supplementary material
Source: PubMed Central journal article supplement (PMC9378363)
Supplement: NIHMS1778536-supplement-Supplementary_Figures_and_Supplementary_Tables.pdf [file NIHMS1778536-supplement-Supplementary_Figures_and_Supplementary_Tables.pdf]

# Supplementary Figure 1

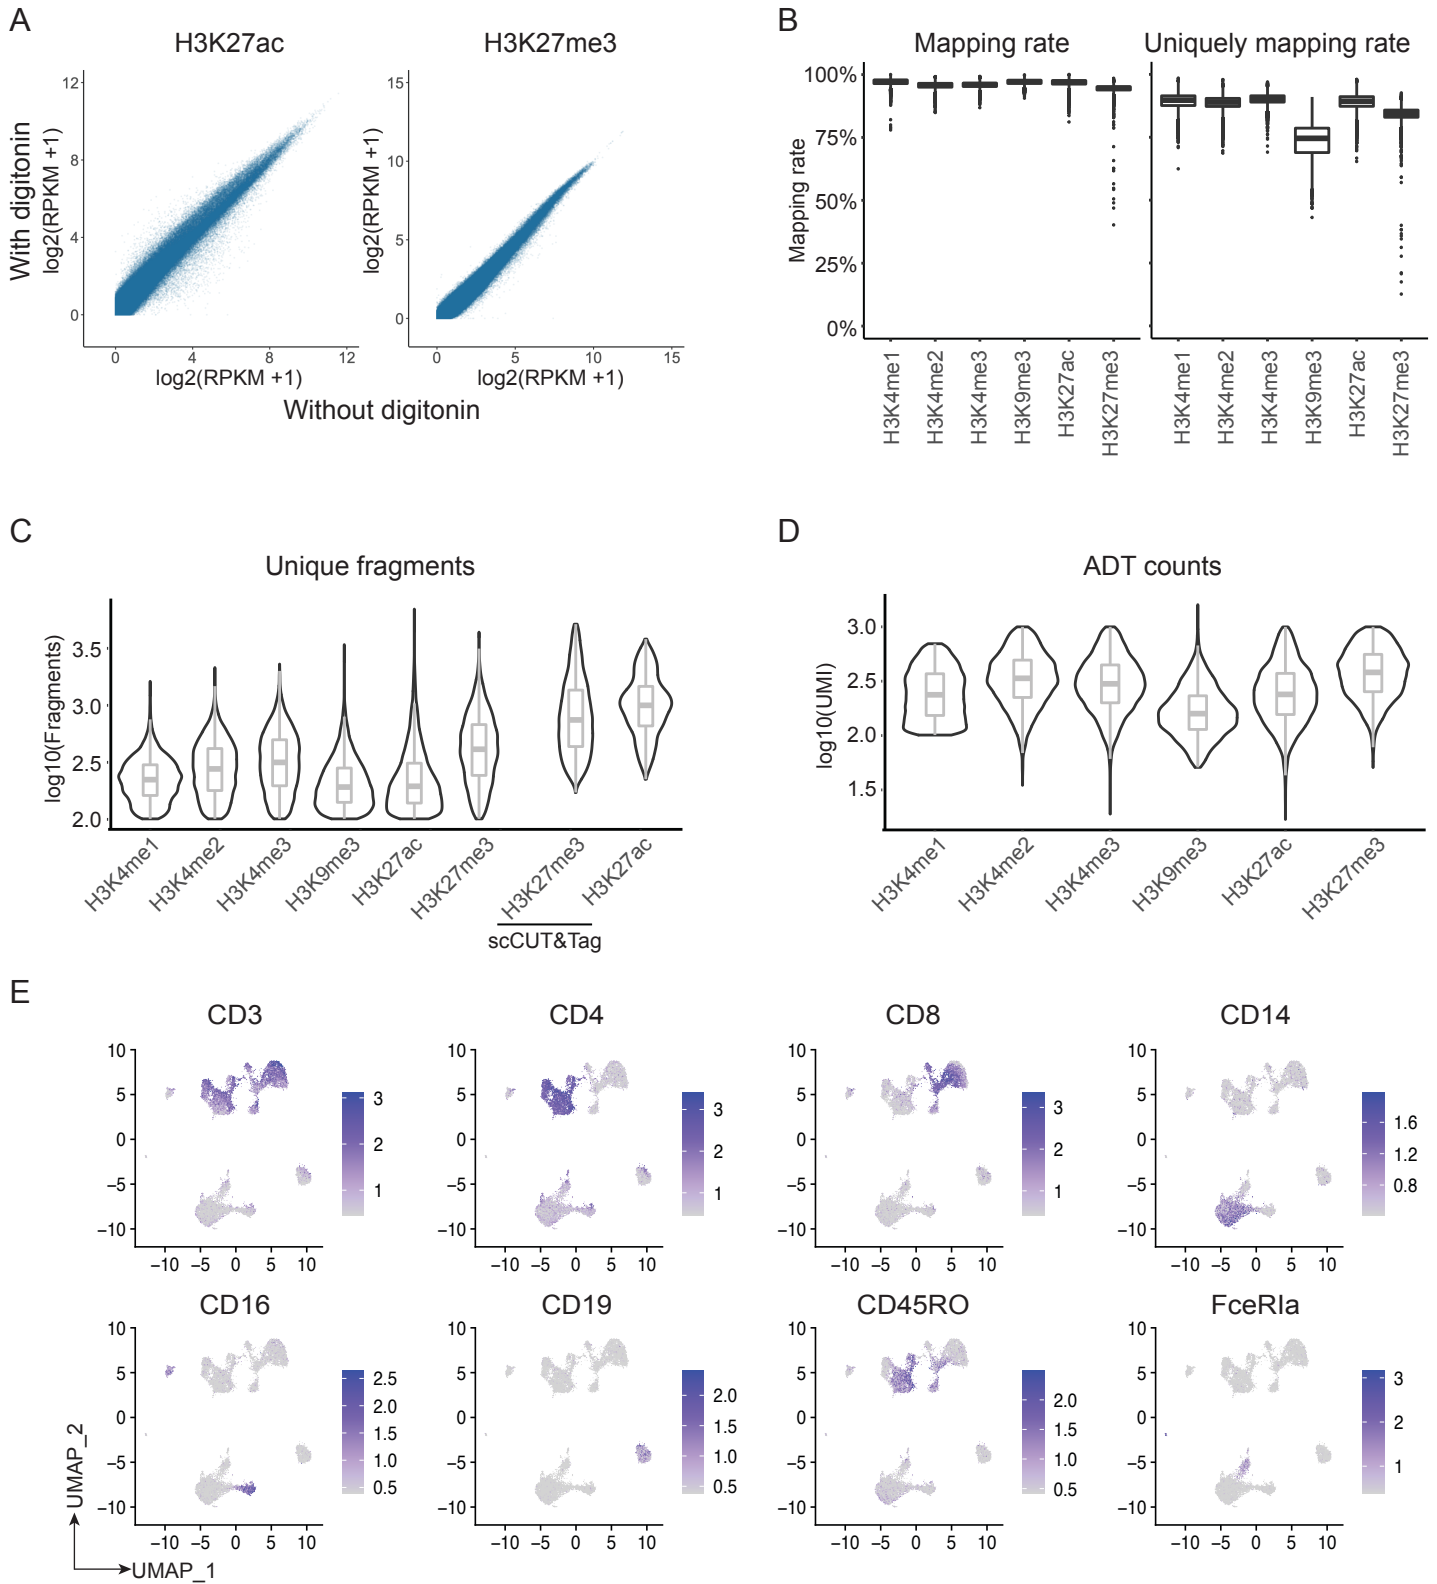

**Supplementary Figure 1: Quality control for scCUT&Tag-pro experiments.**

**(A)** Scatter plots showing the H3K27ac (left) and H3K27me3 (right) enrichment levels (5-kb window) in fixed PBMC between datasets generated with and without digitonin. RPKM: Reads Per Kilobase per Million mapped reads. **(B)** Boxplot of single cell mapping rates and unique mapping rates for scCUT&Tag-pro experiments in PBMC. **(C)** Violin plots showing the number of unique fragments per cell detected in each PBMC scCUT&Tag-pro experiment, as well as from a recent publication describing scCUT&Tag in the same system (Wu et al, 2021). **(D)** Violin plots of unique antibody-derived tag (ADT) counts per cell for each experiment. **(E)** Feature plots visualizing the expression of canonical surface proteins for the H3K4me1 scCUT&Tag-pro experiment. Proteins visualized include markers of CD4 and CD8 T, CD14 and CD16 monocytes, B cells (CD19), Memory T (CD45RO), cDC2 (FcεR1a), and MAIT (TCR-V-7.2) cells. Boxplots show  $n = 12,770$  (H3K4me1),  $9,575$  (H3K4me2),  $10,386$  (H3K4me3),  $8,304$  (H3K9me3),  $15,609$  (H3K27ac) and  $8,232$  (H3K27me3) cells from scCUT&Tag-pro and  $n = 15,292$  (H3K27me3),  $10,458$  (H3K27ac) cells from scCUT&Tag experiments (Wu et al, 2021). The center, bounds and whiskers of the boxplot show median, quartiles and data points that lie within  $1.5\times$  interquartile range of the lower and upper quartiles, respectively. Data beyond the end of the whiskers are plotted individually.

# Supplementary Figure 2

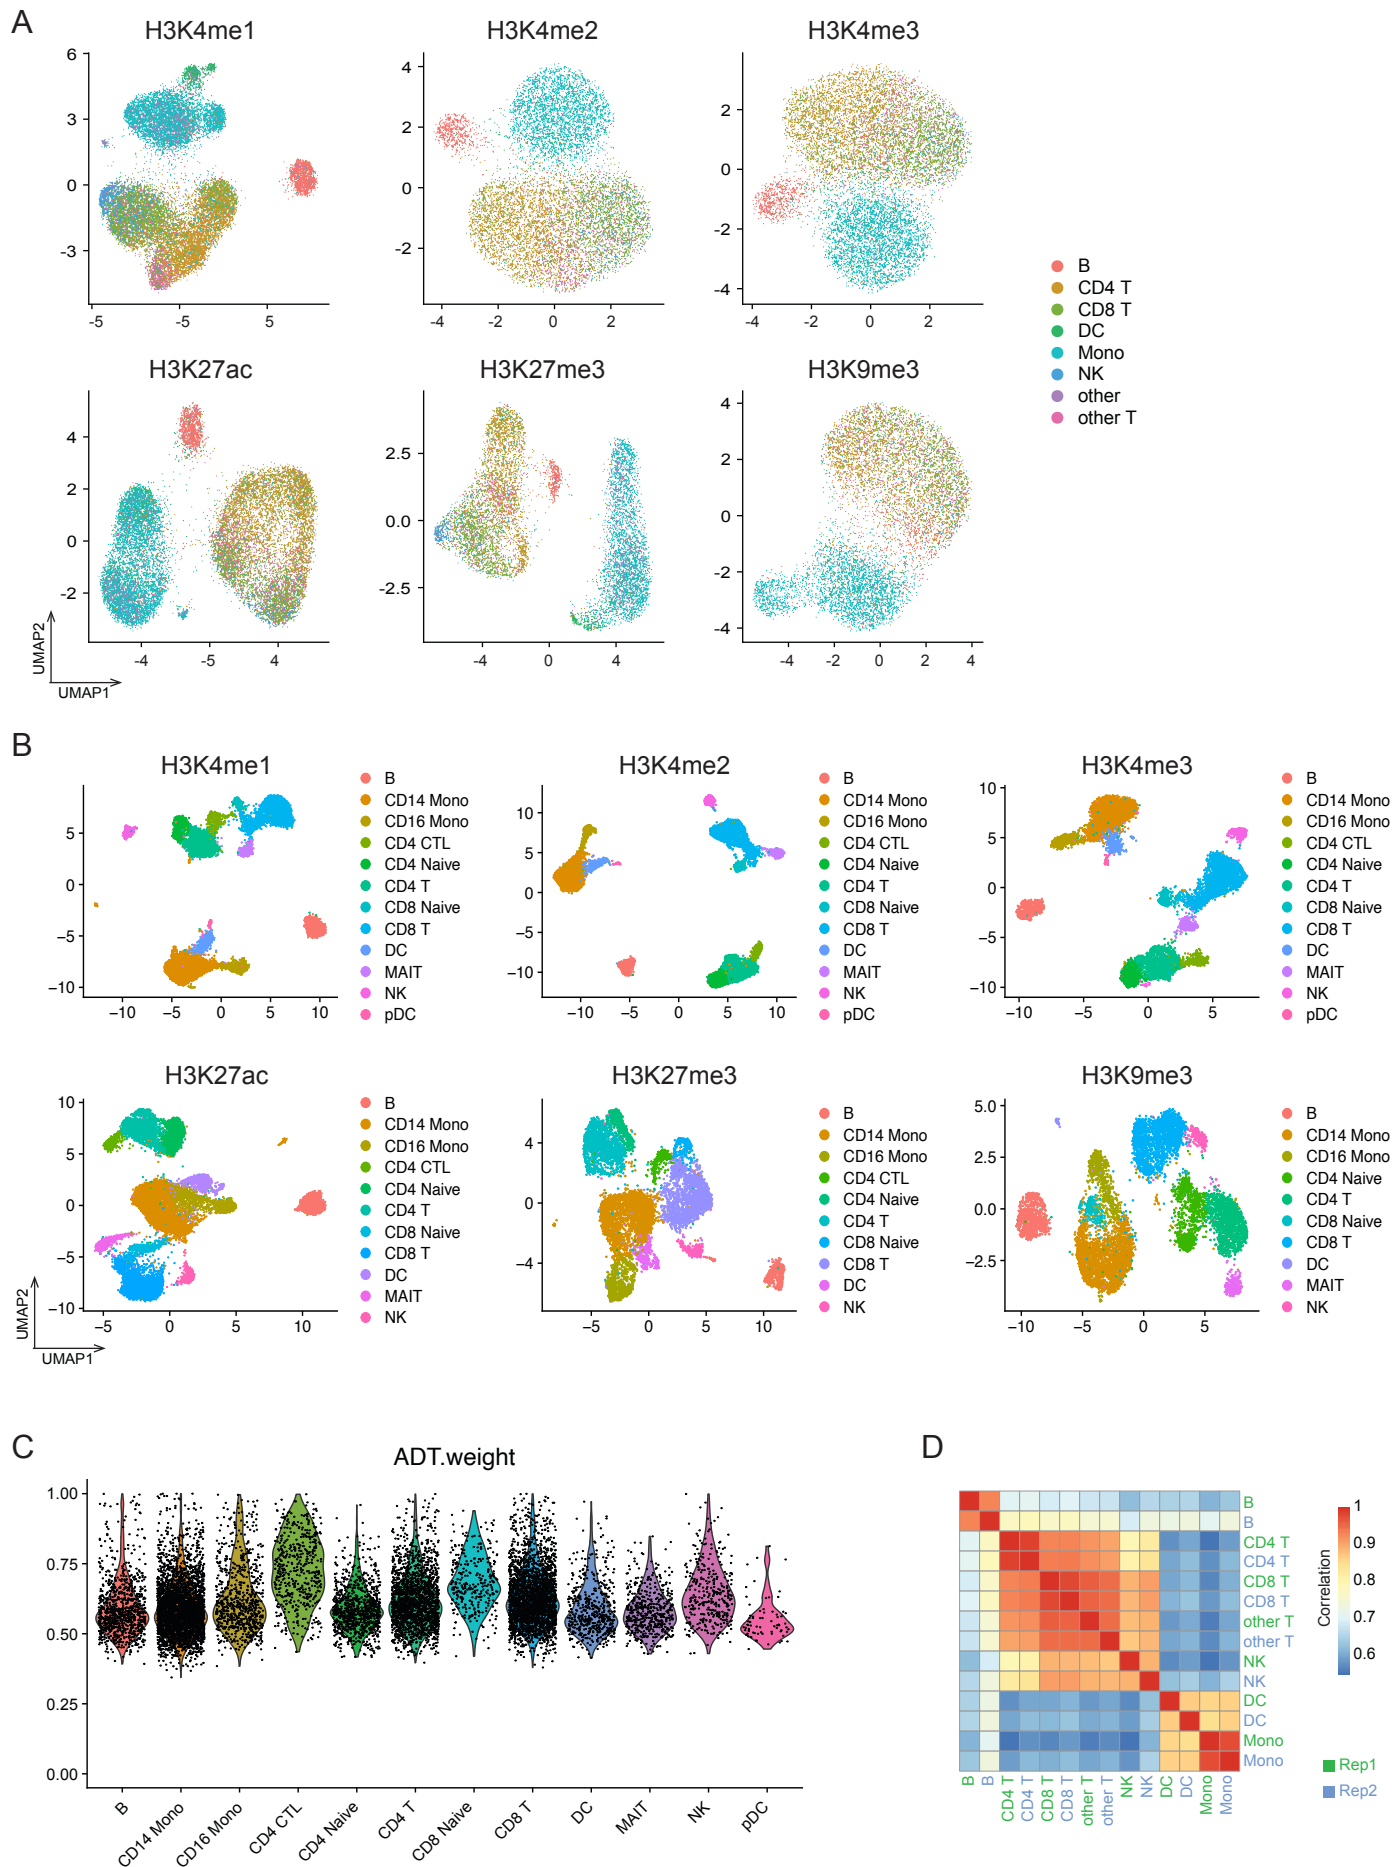

**Supplementary Figure 2: Multimodal analysis of scCUT&Tag-pro.**

(A) UMAP visualizations of six histone modifications profiled with scCUT&Tag-pro and clustered based only on the CUT&Tag modality. (B) Weighted Nearest Neighbor (WNN) analysis of each of the six scCUT&Tag-pro datasets. Cells are visualized and clustered based on a weighted combination of the chromatin and cell surface protein measurements. (C) Violin Plots showing the WNN-assigned 'weights' for the protein modality (H3K4me1 scCUT&Tag-pro experiment). Cluster labels are derived from WNN analysis. (D) Correlation matrix showing Pearson correlation coefficients (5kb genomewide bins) between two biological replicates of H3K4me1 scCUT&Tag-pro in PBMC.

# Supplementary Figure 3

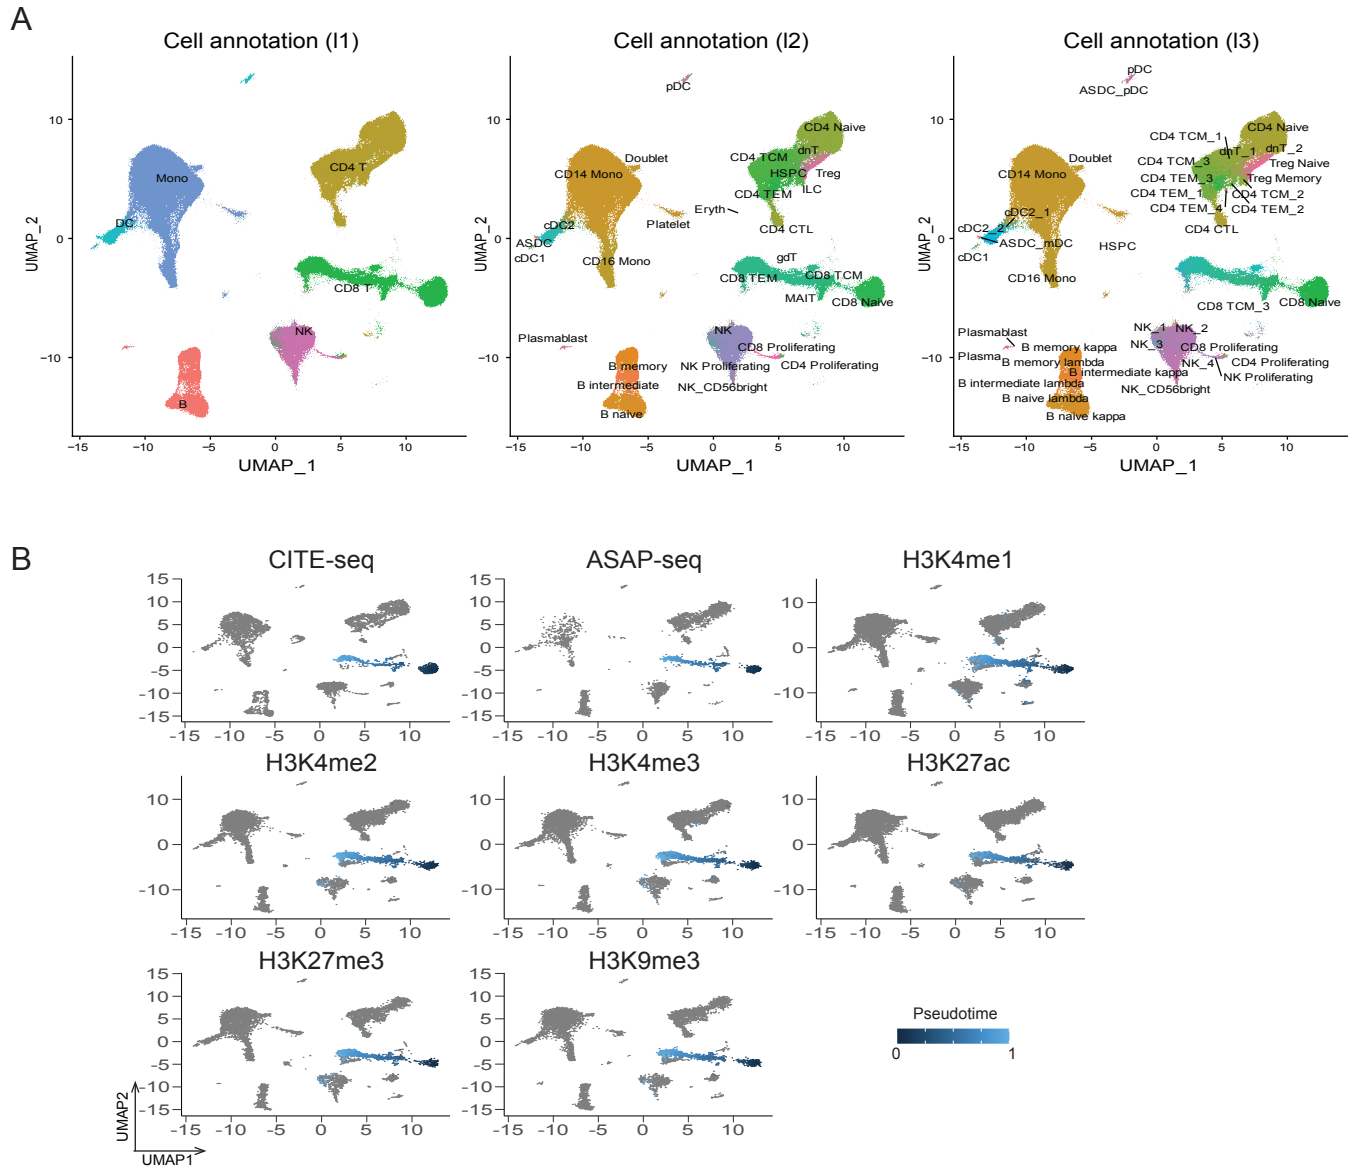

**Supplementary Figure 3: Multimodal and reference-based analysis of scCUT&Tag-pro**

**(A)** Cells from all experiments were mapped onto the reference CITE-seq dataset from (Hao et al, 2021). Shown are the reference-assigned labels for all cells. Same as Figure 2B, but visualizing all three levels of resolution. **(B)** Visualization of integrated developmental trajectory for CD8 T cells across all experiments. Each panel visualizes cells from a separate experiment, and CD8 T cells are colored based on their order along the integrated developmental trajectory.

# Supplementary Figure 4

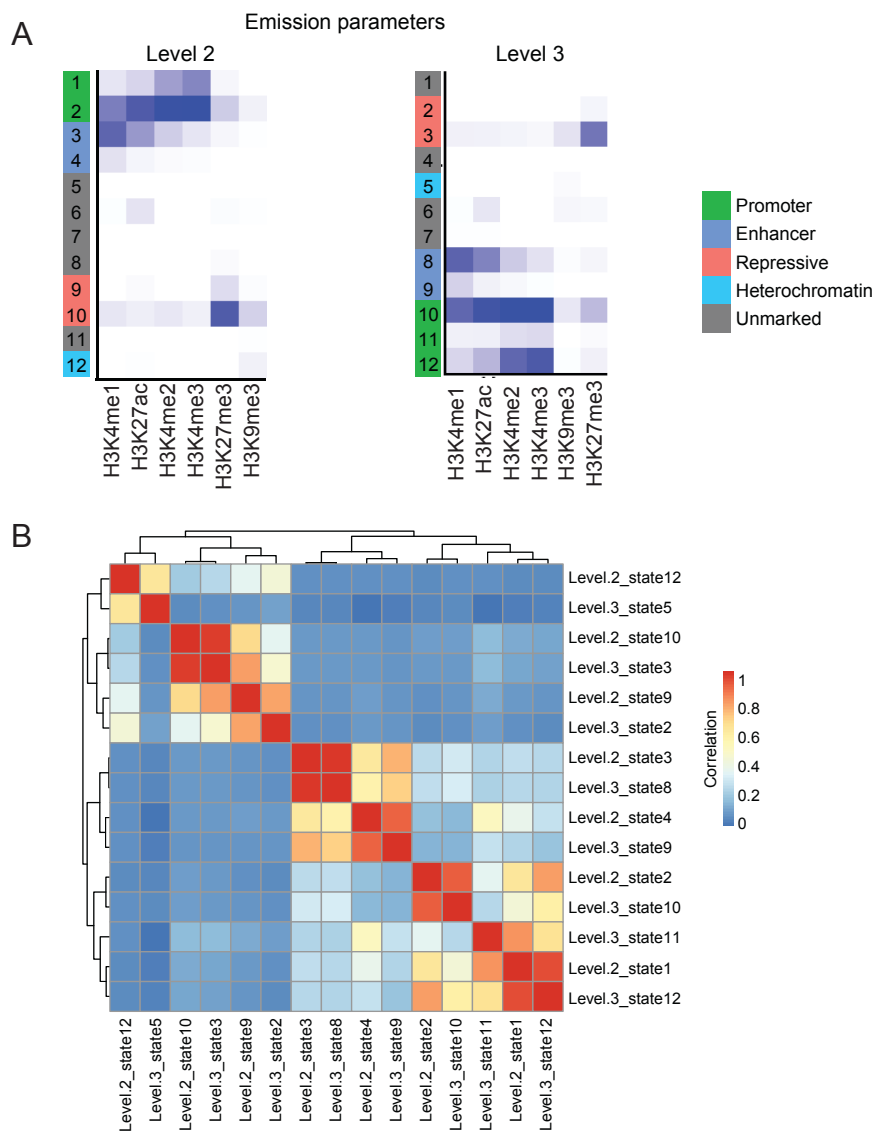

**Supplementary Figure 4: Comparison of ChromHMM annotated chromatin states**

(A) Emission probabilities of the twelve chromatin states learned by the Baum-Welch step of ChromHMM. Results are shown for pseudobulk profiles generated from scCUT&Tag-pro experiments based on level 2 (left) and level 3 (right) cell type annotations. (B) Correlation matrix comparing posterior probabilities generated by scChromHMM for all 200 bp regions across chromosome 22, demonstrating a clear correspondence between states that were identified at either level 2 or level 3 resolution.

# Supplementary Figure 5

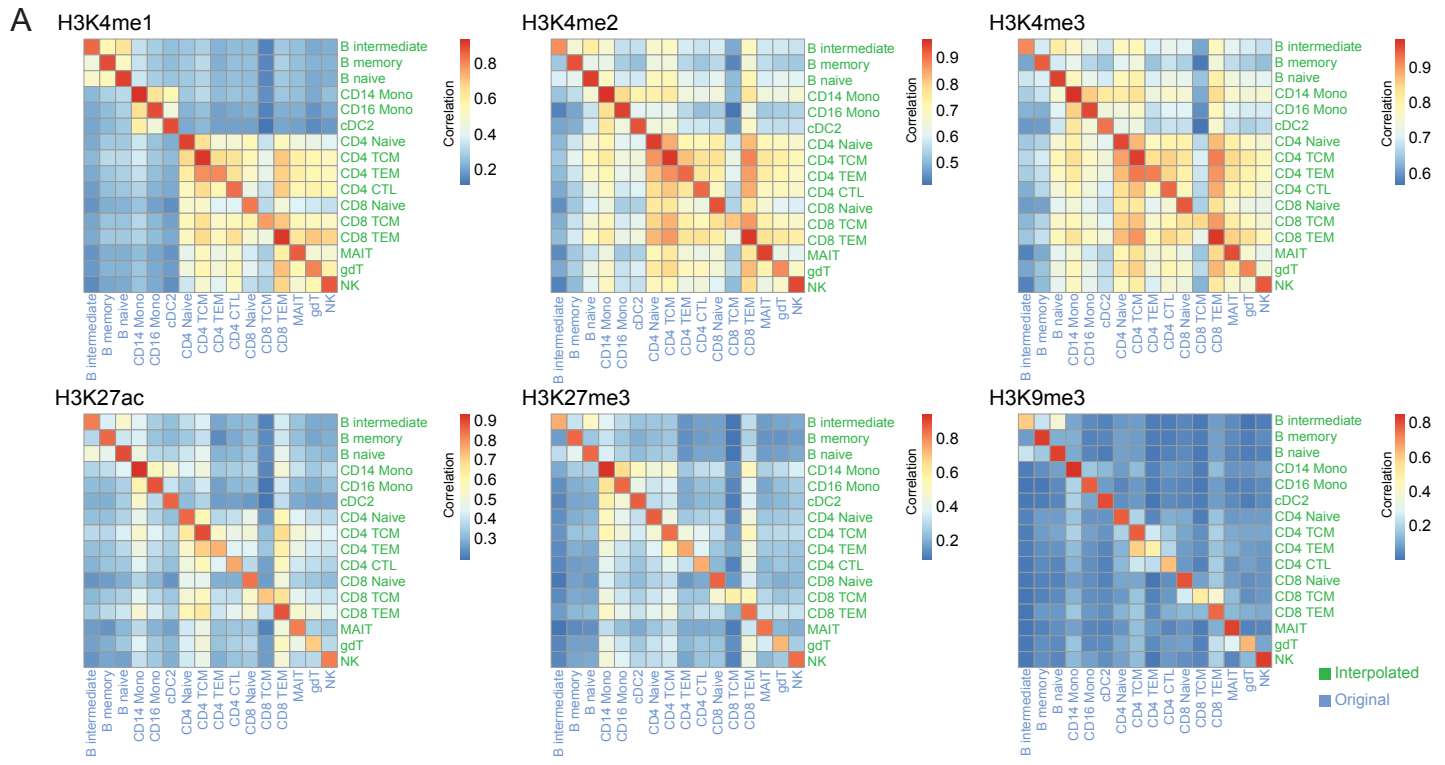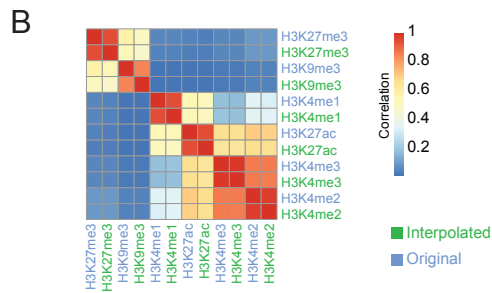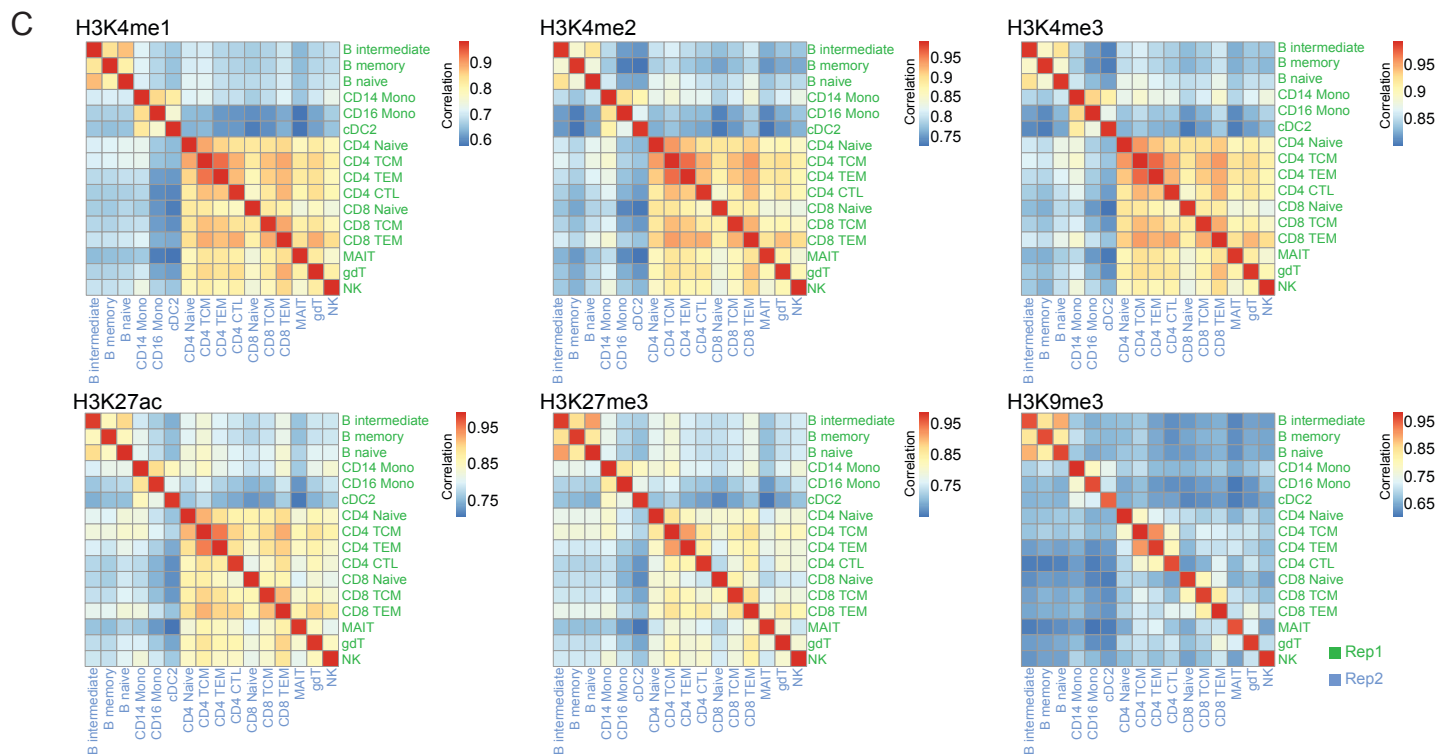

**Supplementary Figure 5: Accurate and robust interpolation of histone modification profiles.**

**(A)** Correlation matrix showing the relationship between original and interpolated values across all cell types. Same as Figure 3B, but for each of the histone modifications measured by scCUT&Tag-pro. **(B)** Pearson correlation matrix for pseudobulk profiles of original and imputed measurements, across multiple chromatin marks in CD14<sup>+</sup> monocytes. This demonstrates that the global relationship between different marks is conserved between original and interpolated profiles. **(C)** We repeated the interpolation twice, each time interpolating values into different random samples ( $n=20,000$ ) of CITE-seq cells. Correlation matrix comparing the interpolated values from both replicates, demonstrating that we obtain highly concordant results.

# Supplementary Figure 6

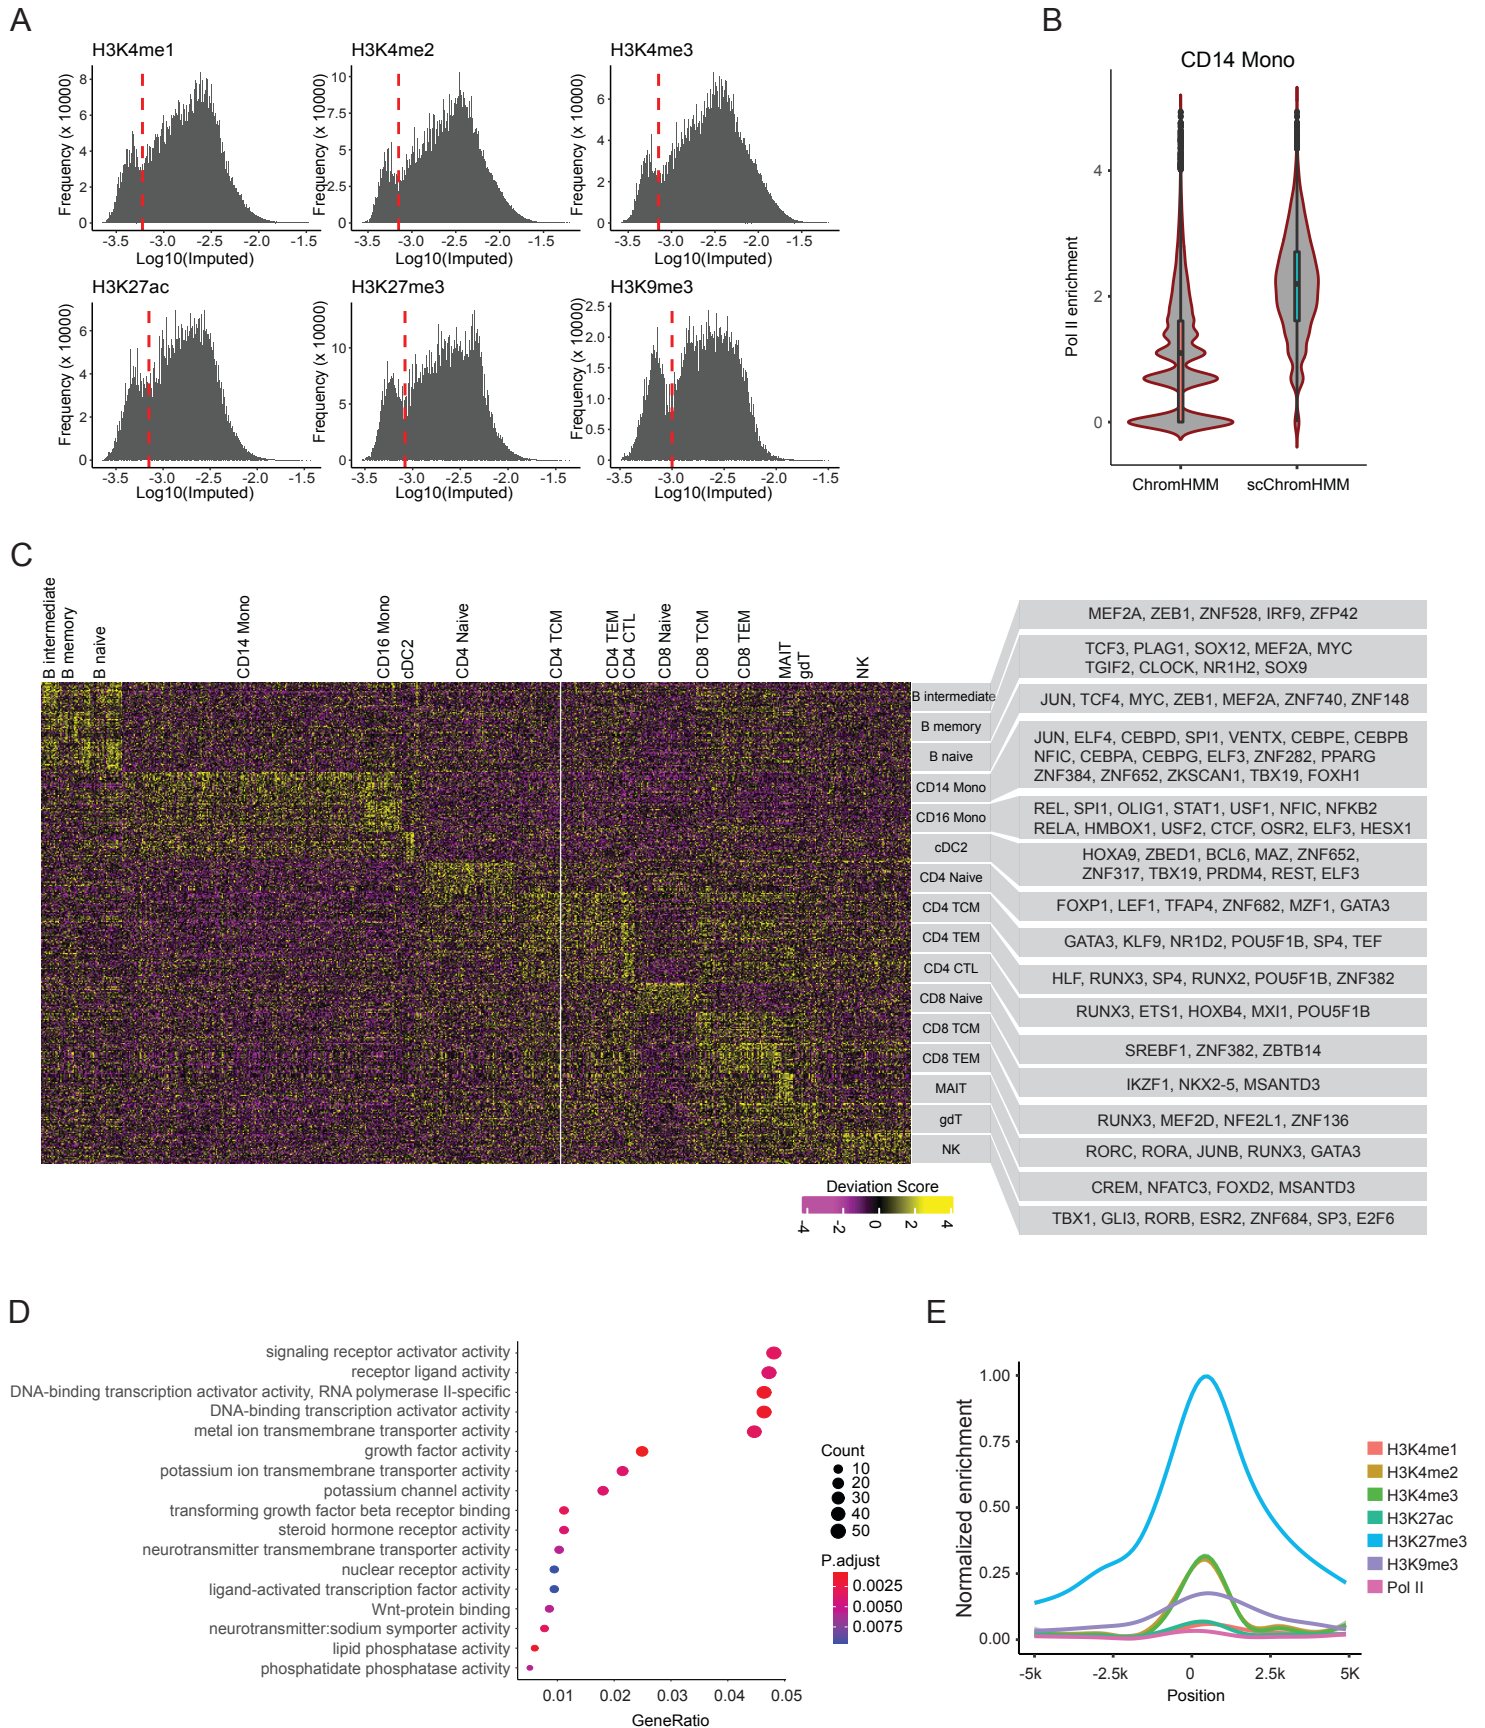

**Supplementary Figure 6: Inference and annotation of chromatin state at single-cell resolution**

(A) Histograms of interpolated values across single cells for each of the histone modifications measured by scCUT&Tag-pro. In each case, we observe a bimodal distribution. Red line marks the threshold used for data discretization, as required by ChromHMM and scChromHMM. (B) Violin plot showing the enrichment of Ser2/Ser5-phosphorylated RNA Polymerase II at active promoters identified by ChromHMM ( $n = 54,149$ ) and scChromHMM ( $n = 5,237$ ) in CD14 monocytes. The center, bounds and whiskers of the boxplot show median, quartiles and data points that lie within  $1.5\times$  interquartile range of the lower and upper quartiles, respectively. Data beyond the end of the whiskers are plotted individually. (C) Heatmap showing heterogeneity in ChromVar deviation scores in single cells, grouped by their reference-derived annotation. We used the scChromHMM-derived posterior probabilities (promoter state) as input to ChromVar, instead of chromatin accessibility levels. In grey boxes, we highlight each identified motif that is also differentially expressed at the transcriptional level. (D) Enriched GO terms for the 1,340 genes shown as blue points in Figure 4E. (E) Metaplot exhibiting the enrichment of histone modifications and Pol II around the promoter regions of the 1,340 genes shown as blue points in Figure 4E. Enrichments were identified specifically in CD14 monocytes.

Supplementary Table 1

| Experiment                                  | CUT&Tag primay antibody      | Company                   | Catalog  | CUT&Tag secondary antibody       | Company           | Catalog    | ADT antibody panel                         | Cell number |
|---------------------------------------------|------------------------------|---------------------------|----------|----------------------------------|-------------------|------------|--------------------------------------------|-------------|
| H3K4me1 scCUT&Tag-pro                       | H3K4me1                      | Abcam                     | ab8895   | Guinea Pig anti-Rabbit IgG (H+L) | Novus Biologicals | NBP1-72763 | TotalSeq™-A Human Universal Cocktail, V1.0 | 12,770      |
| H3K4me2 scCUT&Tag-pro                       | H3K4me2                      | Abcam                     | ab32356  | Guinea Pig anti-Rabbit IgG (H+L) | Novus Biologicals | NBP1-72763 | TotalSeq™-A Human Universal Cocktail, V1.0 | 9,575       |
| H3K4me3 scCUT&Tag-pro                       | H3K4me3                      | Abcam                     | ab213224 | Guinea Pig anti-Rabbit IgG (H+L) | Novus Biologicals | NBP1-72763 | TotalSeq™-A Human Universal Cocktail, V1.0 | 10,386      |
| H3K9me3 scCUT&Tag-pro                       | H3K9me3                      | Abcam                     | ab8898   | Guinea Pig anti-Rabbit IgG (H+L) | Novus Biologicals | NBP1-72763 | TotalSeq™-A Human Universal Cocktail, V1.0 | 8,304       |
| H3K27ac scCUT&Tag-pro                       | H3K27ac                      | Abcam                     | ab177178 | Guinea Pig anti-Rabbit IgG (H+L) | Novus Biologicals | NBP1-72763 | TotalSeq™-A Human Universal Cocktail, V1.0 | 15,609      |
| H3K27me3 scCUT&Tag-pro                      | H3K27me3                     | Cell Signaling Technology | 9733     | Guinea Pig anti-Rabbit IgG (H+L) | Novus Biologicals | NBP1-72763 | TotalSeq™-A Human Universal Cocktail, V1.0 | 8,232       |
| RNA Polymerase II (Ser2/Ser5) scCUT&Tag-pro | Phospho-Rpb1 CTD (Ser2/Ser5) | Cell Signaling Technology | 13546    | Guinea Pig anti-Rabbit IgG (H+L) | Novus Biologicals | NBP1-72763 | TotalSeq™-A Human Universal Cocktail, V1.0 | 10,893      |

Supplementary Table 2

| DNA_ID | Description                     | Clone    | Barcode          | Ensembl ID      | Gene Name |
|--------|---------------------------------|----------|------------------|-----------------|-----------|
| A0006  | anti-human CD86                 | IT2.2    | GTCTTTGTCAGTGCA  | ENSG00000114013 | CD86      |
| A0007  | anti-human CD274 (B7-H1, PD-L1) | 29E.2A3  | GTTGTCCGACAATAC  | ENSG00000120217 | CD274     |
| A0020  | anti-human CD270 (HVEM, TR2)    | 122      | TGATAGAAACAGACC  | ENSG00000157873 | TNFRSF14  |
| A0023  | anti-human CD155 (PVR)          | SKII.4   | ATCACATCGTTGCCA  | ENSG00000073008 | PVR       |
| A0024  | anti-human CD112 (Nectin-2)     | TX31     | AACCTTCCGTCTAAG  | ENSG00000130202 | NECTIN2   |
| A0026  | anti-human CD47                 | CC2C6    | GCATTCTGTACCTA   | ENSG00000196776 | CD47      |
| A0029  | anti-human CD48                 | BJ40     | CTACGACGTAGAAGA  | ENSG00000117091 | CD48      |
| A0031  | anti-human CD40                 | 5C3      | CTCAGATGGAGTATG  | ENSG00000101017 | CD40      |
| A0032  | anti-human CD154                | 24-31    | GCTAGATAGATGCAA  | ENSG00000102245 | CD40LG    |
| A0033  | anti-human CD52                 | HI186    | CTTTGTACGAGCAAA  | ENSG00000169442 | CD52      |
| A0034  | anti-human CD3                  | UCHT1    | CTCATTGTAACCTCT  | ENSG00000167286 | CD3D      |
| A0046  | anti-human CD8                  | SK1      | GCGCAACTTGATGAT  | ENSG00000153563 | CD8A      |
| A0047  | anti-human CD56 (NCAM)          | 5.1H11   | TCCTTTCTTGATAGG  | ENSG00000149294 | NCAM1     |
| A0050  | anti-human CD19                 | HIB19    | CTGGGCAATTACTCG  | ENSG00000177455 | CD19      |
| A0052  | anti-human CD33                 | P67.6    | TAACTCAGGGCCTAT  | ENSG00000105383 | CD33      |
| A0053  | anti-human CD11c                | S-HCL-3  | TACGCCTATAACTTG  | ENSG00000140678 | ITGAX     |
| A0058  | anti-human HLA-A,B,C            | W6/32    | TATGCGAGGCTTATC  | ENSG00000206503 | HLA-A     |
| A0063  | anti-human CD45RA               | HI100    | TCAATCCTTCCGCTT  | ENSG00000081237 | PTPRC     |
| A0064  | anti-human CD123                | 6H6      | CTTCACTCTGTCAGG  | ENSG00000185291 | IL3RA     |
| A0066  | anti-human CD7                  | CD7-6B7  | TGGATTCCCGGACTT  | ENSG00000173762 | CD7       |
| A0070  | anti-human/mouse CD49f          | GoH3     | TTCCGAGGATGATCT  | ENSG00000091409 | ITGA6     |
| A0071  | anti-human CD194 (CCR4)         | L291H4   | AGCTTACCTGCACGA  | ENSG00000183813 | CCR4      |
| A0072  | anti-human CD4                  | RPA-T4   | TGTTCCCGCTCAACT  | ENSG0000010610  | CD4       |
| A0073  | anti-mouse/human CD44           | IM7      | TGGCTTACGGTCCCTA | ENSG00000026508 | CD44      |
| A0081  | anti-human CD14                 | M5E2     | TCTCAGACCTCCGTA  | ENSG00000170458 | CD14      |
| A0083  | anti-human CD16                 | 3G8      | AAGTTCACTCTTTGC  | ENSG00000203747 | FCGR3A    |
| A0085  | anti-human CD25                 | BC96     | TTTGTCTGTACGCC   | ENSG00000134460 | IL2RA     |
| A0087  | anti-human CD45RO               | UCHL1    | CTCCGAATCATGTTG  | ENSG00000081237 | PTPRC     |
| A0088  | anti-human CD279 (PD-1)         | EH12.2H7 | ACAGCGCCGTATTTA  | ENSG00000188389 | PDCD1     |
| A0089  | anti-human TIGIT (VSTM3)        | A15153G  | TTGCTTACCGCCAGA  | ENSG00000181847 | TIGIT     |
| A0090  | Mouse IgG1, κ isotype Ctrl      | MOPC-21  | GCCGGACGACATTAA  |                 |           |
| A0091  | Mouse IgG2a, κ isotype Ctrl     | MOPC-173 | CTCCTACCTAAACTG  |                 |           |



|       |                                   |                  |                 |                 |         |
|-------|-----------------------------------|------------------|-----------------|-----------------|---------|
| A0092 | Mouse IgG2b, κ isotype Ctrl       | MPC-11           | ATATGTATCACGCGA |                 |         |
| A0095 | Rat IgG2b, κ Isotype Ctrl         | RTK4530          | GATTCTTGACGACCT |                 |         |
| A0100 | anti-human CD20                   | 2H7              | TTCTGGGTCCCTAGA | ENSG00000156738 | MS4A1   |
| A0101 | anti-human CD335 (NKp46)          | 9E2              | ACAATTTGAACAGCG | ENSG00000189430 | NCR1    |
| A0124 | anti-human CD31                   | WM59             | ACCTTTATGCCACGG | ENSG00000261371 | PECAM1  |
| A0127 | anti-Human Podoplanin             | NC-08            | GGTTACTCGTTGTGT | ENSG00000162493 | PDPN    |
| A0134 | anti-human CD146                  | P1H12            | CCTTGATAACATCA  | ENSG00000076706 | MCAM    |
| A0136 | anti-human IgM                    | MHM-88           | TAGCGAGCCCGTATA | ENSG00000211899 | IGHM    |
| A0138 | anti-human CD5                    | UCHT2            | CATTAACGGGATGCC | ENSG00000110448 | CD5     |
| A0140 | anti-human CD183 (CXCR3)          | G025H7           | GCGATGGTAGATTAT | ENSG00000186810 | CXCR3   |
| A0141 | anti-human CD195 (CCR5)           | J418F1           | CCAAAGTAAGAGCCA | ENSG00000160791 | CCR5    |
| A0142 | anti-human CD32                   | FUN-2            | GCTTCCGAATTACCG | ENSG00000143226 | FCGR2A  |
| A0143 | anti-human CD196 (CCR6)           | G034E3           | GATCCCTTTGTCACT | ENSG00000112486 | CCR6    |
| A0144 | anti-human CD185 (CXCR5)          | J252D4           | AATTCAACCGTCGCC | ENSG00000160683 | CXCR5   |
| A0145 | Hu CD103 (Integrin αE)            | Ber-ACT8         | GACCTCATTGTGAAT | ENSG00000083457 | ITGAE   |
| A0146 | anti-human CD69                   | FN50             | GTCTCTTGGCTTAAA | ENSG00000110848 | CD69    |
| A0147 | anti-human CD62L                  | DREG-56          | GTCCCTGCAACTTGA | ENSG00000188404 | SELL    |
| A0149 | anti-human CD161                  | HP-3G10          | GTACGCAGTCCTTCT | ENSG00000111796 | KLRB1   |
| A0151 | anti-human CD152 (CTLA-4)         | BNI3             | ATGGTTTACGTAATC | ENSG00000163599 | CTLA4   |
| A0152 | anti-human CD223 (LAG-3)          | 11C3C65          | CATTTGTCTGCCGGT | ENSG00000089692 | LAG3    |
| A0153 | anti-human KLRG1 (MAFA)           | SA231A2          | CTTATTTTCTGCCCT | ENSG00000139187 | KLRG1   |
| A0154 | anti-human CD27                   | O323             | GCACTCCTGCATGTA | ENSG00000139193 | CD27    |
| A0155 | anti-human CD107a (LAMP-1)        | H4A3             | CAGCCCACTGCAATA | ENSG00000185896 | LAMP1   |
| A0156 | anti-human CD95 (Fas)             | DX2              | CCAGCTCATTAGAGC | ENSG00000026103 | FAS     |
| A0158 | anti-human CD134 (OX40)           | er-ACT35 (ACT35) | AACCCACCGTTGTTA | ENSG00000186827 | TNFRSF4 |
| A0159 | anti-human HLA-DR                 | L243             | AATAGCGAGCAAGTA | ENSG00000204287 | HLA-DRA |
| A0160 | anti-human CD1c                   | L161             | GAGCTACTTCACTCG | ENSG00000158481 | CD1C    |
| A0161 | anti-human CD11b                  | ICRF44           | GACAAGTGATCTGCA | ENSG00000169896 | ITGAM   |
| A0162 | anti-human CD64                   | 10.1             | AAGTATGCCCTACGA | ENSG00000150337 | FCGR1A  |
| A0163 | anti-human CD141 (Thrombomodulin) | M80              | GGATAACCGCGCTTT | ENSG00000178726 | THBD    |
| A0165 | Hu CD314 (NKG2D)                  | 1D11             | CGTGTTTGTTCCTCA | ENSG00000213809 | KLRK1   |
| A0167 | anti-human CD35                   | E11              | ACTTCCGTCGATCTT | ENSG00000203710 | CR1     |
| A0168 | anti-human CD57 Recombinant       | QA17A04          | AACTCCCTATGGAGG | ENSG00000109956 | B3GAT1  |

|       |                                             |                |                  |                 |           |
|-------|---------------------------------------------|----------------|------------------|-----------------|-----------|
| A0170 | anti-human CD272 (BTLA)                     | MIH26          | GTTATTGGACTAAGG  | ENSG00000186265 | BTLA      |
| A0171 | anti-human/mouse/rat CD278 (ICOS)           | C398.4A        | CGCGCACCCATTAAA  | ENSG00000163600 | ICOS      |
| A0172 | anti-human CD275 (B7-H2, B7-RP1, ICOS)      | 9F.8A4         | GTTAGTGTTAGCTTG  | ENSG00000160223 | ICOSLG    |
| A0174 | anti-human CD58 (LFA-3)                     | TS2/9          | GTTCCATGGACGAC   | ENSG00000116815 | CD58      |
| A0176 | anti-human CD39                             | A1             | TTACCTGGTATCCGT  | ENSG00000138185 | ENTPD1    |
| A0179 | anti-human CX3CR1                           | K0124E1        | AGTATCGTCTCTGGG  | ENSG00000168329 | CX3CR1    |
| A0180 | anti-human CD24                             | ML5            | AGATTCCCTTCGTGTT | ENSG00000272398 | CD24      |
| A0181 | anti-human CD21                             | Bu32           | AACCTAGTAGTTCGG  | ENSG00000117322 | CR2       |
| A0185 | anti-human CD11a                            | TS2/4          | TATATCCCTTGTGAGC | ENSG00000005844 | ITGAL     |
| A0187 | anti-human CD79b (Igβ)                      | CB3-1          | ATTCTTCAACCGAAG  | ENSG00000007312 | CD79B     |
| A0189 | anti-human CD244 (2B4)                      | C1.7           | TCGCTTGGATGGTAG  | ENSG00000122223 | CD244     |
| A0206 | anti-human CD169 (Sialoadhesin, Siglec-169) | 7-239          | TACTCAGCGTGTTTG  | ENSG00000088827 | SIGLEC1   |
| A0214 | anti-human/mouse integrin β7                | FIB504         | TCCTTGGATGTACCG  | ENSG00000139626 | ITGB7     |
| A0215 | anti-human CD268 (BAFF-R)                   | 11C1           | CGAAGTCGATCCGTA  | ENSG00000159958 | TNFRSF13C |
| A0216 | anti-human CD42b                            | HIP1           | TCCTAGTACCGAAGT  | ENSG00000203618 | GP1BB     |
| A0217 | anti-human CD54                             | HA58           | CTGATAGACTTGAGT  | ENSG00000090339 | ICAM1     |
| A0218 | anti-human CD62P (P-Selectin)               | AK4            | CCTTCCGTATCCCTT  | ENSG00000174175 | SELP      |
| A0219 | anti-human CD119 (IFN-γ R α chain)          | GIR-208        | TGTGTATTCCTTGT   | ENSG00000027697 | IFNGR1    |
| A0224 | anti-human TCR α/β                          | IP26           | CGTAACGTAGAGCGA  |                 |           |
| A0236 | Rat IgG1, κ isotype Ctrl                    | RTK2071        | ATCAGATGCCCTCAT  |                 |           |
| A0237 | Rat IgG1, λ Isotype Ctrl                    | G0114F7        | GGGAGCGATTCAACT  |                 |           |
| A0238 | Rat IgG2a, κ Isotype Ctrl                   | RTK2758        | AAGTCAGGTTTCGTTT |                 |           |
| A0240 | Rat IgG2c, κ Isotype Ctrl                   | RTK4174        | TCCAGGCTAGTCATT  |                 |           |
| A0241 | Armenian Hamster IgG Isotype Ctrl           | HTK888         | CCTGTCATTAAGACT  |                 |           |
| A0242 | anti-human CD192 (CCR2)                     | K036C2         | GAGTTCCTTACCTG   | ENSG00000121807 | CCR2      |
| A0246 | anti-human CD122 (IL-2Rβ)                   | TU27           | TCATTTCCCTCCGATT | ENSG00000100385 | IL2RB     |
| A0247 | anti-human CD267 (TACI)                     | 1A1            | AGTGATGGAGCGAAC  | ENSG00000240505 | TNFRSF13B |
| A0352 | anti-human FcεRIα                           | AER-37 (CRA-1) | CTCGTTTCCGTATCG  | ENSG00000179639 | FCER1A    |
| A0353 | anti-human CD41                             | HIP8           | ACGTTGTGGCCTTGT  | ENSG00000005961 | ITGA2B    |
| A0355 | anti-human CD137 (4-1BB)                    | 4B4-1          | CAGTAAGTTCGGGAC  | ENSG00000049249 | TNFRSF9   |
| A0357 | anti-human CD43                             | CD43-10G7      | GATTAACCAGCTCAT  | ENSG00000197471 | SPN       |
| A0358 | anti-human CD163                            | GHI/61         | GCTTCTCCTTCCCTTA | ENSG00000177575 | CD163     |
| A0359 | anti-human CD83                             | HB15e          | CCACTCATTTCCGGT  | ENSG00000112149 | CD83      |

|       |                                        |           |                  |                 |         |
|-------|----------------------------------------|-----------|------------------|-----------------|---------|
| A0364 | anti-human CD13                        | WM15      | TTTCAACGCCCTTTC  | ENSG00000166825 | ANPEP   |
| A0367 | anti-human CD2                         | TS1/8     | TACGATTTGTCAGGG  | ENSG00000116824 | CD2     |
| A0368 | anti-human CD226 (DNAM-1)              | 11A8      | TCTCAGTGTTTGTGG  | ENSG00000150637 | CD226   |
| A0369 | anti-human CD29                        | TS2/16    | GTATTCCCTCAGTCA  | ENSG00000150093 | ITGB1   |
| A0370 | anti-human CD303 (BDCA-2)              | 201A      | GAGATGTCCGAATTT  | ENSG00000198178 | CLEC4C  |
| A0371 | anti-human CD49b                       | P1E6-C5   | GCTTTCTTCAGTATG  | ENSG00000164171 | ITGA2   |
| A0372 | anti-human CD61                        | VI-PL2    | AGGTTGGAGTAGACT  | ENSG00000259207 | ITGB3   |
| A0373 | anti-human CD81 (TAPA-1)               | 5A6       | GTATCCTTCCTTGGC  | ENSG00000110651 | CD81    |
| A0383 | anti-human CD55                        | JS11      | GCTCATTACCCATTA  | ENSG00000196352 | CD55    |
| A0384 | anti-human IgD                         | IA6-2     | CAGTCTCCGTAGAGT  | ENSG00000211898 | IGHD    |
| A0385 | anti-human CD18                        | TS1/18    | TATTGGGACACTTCT  | ENSG00000160255 | ITGB2   |
| A0386 | anti-human CD28                        | CD28.2    | TGAGAACGACCCTAA  | ENSG00000178562 | CD28    |
| A0389 | anti-human CD38                        | HIT2      | TGTACCCGCTTGTGA  | ENSG00000004468 | CD38    |
| A0390 | anti-human CD127 (IL-7R $\alpha$ )     | A019D5    | GTGTGTTGTCCTATG  | ENSG00000168685 | IL7R    |
| A0391 | anti-human CD45                        | HI30      | TGCAATTACCCGGAT  | ENSG00000081237 | PTPRC   |
| A0393 | anti-human CD22                        | S-HCL-1   | GGGTTGTTGTCTTTG  | ENSG00000012124 | CD22    |
| A0394 | anti-human CD71                        | CY1G4     | CCGTGTTCCCTCATTA | ENSG00000072274 | TFRC    |
| A0396 | anti-human CD26                        | BA5b      | GGTGGCTAGATAATG  | ENSG00000197635 | DPP4    |
| A0398 | anti-human CD115 (CSF-1R)              | 9-4D2-1E4 | AATCACGGTCCTTGT  | ENSG00000182578 | CSF1R   |
| A0404 | anti-human CD63                        | H5C6      | GAGATGTCTGCAACT  | ENSG00000135404 | CD63    |
| A0406 | anti-human CD304 (Neuropilin-1)        | 12C2      | GGACTAAGTTTCGTT  | ENSG00000099250 | NRP1    |
| A0407 | anti-human CD36                        | 5-271     | TTCTTTGCCTTGCCA  | ENSG00000135218 | CD36    |
| A0408 | anti-human CD172a (SIRP $\alpha$ )     | 15-414    | CGTGTTTAACTTGAG  | ENSG00000198053 | SIRPA   |
| A0419 | anti-human CD72                        | 3F3       | CAGTCGTGGTAGATA  | ENSG00000137101 | CD72    |
| A0420 | anti-human CD158 (KIR2DL1/S1/S3/S5)    | HP-MA4    | TATCAACCAACGCTT  | ENSG00000125498 | KIR2DL1 |
| A0446 | anti-human CD93                        | VIMD2     | GCGCTACTTCCTTGA  | ENSG00000125810 | CD93    |
| A0447 | anti-human CD200 (OX2)                 | OX-104    | CACGTAGACCTTTGC  | ENSG00000091972 | CD200   |
| A0575 | anti-human CD49a                       | TS2/7     | ACTGATGGACTCAGA  | ENSG00000213949 | ITGA1   |
| A0576 | anti-human CD49d                       | 9F10      | CCATTCAACTTCCGG  | ENSG00000115232 | ITGA4   |
| A0577 | anti-human CD73 (Ecto-5'-nucleotidase) | AD2       | CAGTTCCTCAGTTCG  | ENSG00000135318 | NT5E    |
| A0579 | anti-human CD9                         | HI9a      | GAGTCACCAATCTGC  | ENSG00000010278 | CD9     |
| A0581 | anti-human TCR V $\alpha$ 7.2          | 3C10      | TACGAGCAGTATTCA  |                 |         |
| A0582 | anti-human TCR V $\delta$ 2            | B6        | TCAGTCAGATGGTAT  |                 |         |

|       |                                    |           |                  |                 |         |
|-------|------------------------------------|-----------|------------------|-----------------|---------|
| A0586 | anti-human CD354 (TREM-1)          | TREM-26   | TAGCCGTTTCCTTTG  | ENSG00000124731 | TREM1   |
| A0590 | anti-human CD305 (LAIR1)           | NKTA255   | ATTTCCATTCCCTGT  | ENSG00000167613 | LAIR1   |
| A0591 | anti-human LOX-1                   | 15C4      | ACCCTTTACCGAATA  | ENSG00000173391 | OLR1    |
| A0599 | anti-human CD158e1 (KIR3DL1, NKB1) | DX9       | GGACGCTTTCCTTGA  | ENSG00000167633 | KIR3DL1 |
| A0817 | anti-human CD109                   | W7C5      | CACTTAACTCTGGGT  | ENSG00000156535 | CD109   |
| A0822 | anti-human CD142                   | NY2       | CACTGCCGTCGATTA  | ENSG00000117525 | F3      |
| A0830 | anti-human CD319 (CRACC)           | 162.1     | AGTATGCCATGTCTT  | ENSG00000026751 | SLAMF7  |
| A0845 | anti-human CD99                    | 3B2/TA8   | ACCCGTCCCTAAGAA  | ENSG00000002586 | CD99    |
| A0853 | anti-human CLEC12A                 | 50C1      | CATTAGAGTCTGCCA  | ENSG00000172322 | CLEC12A |
| A0861 | anti-human CD151 (PETA-3)          | 50-6      | CTTACCTAGTCATTC  | ENSG00000177697 | CD151   |
| A0864 | anti-human CD352 (NTB-A)           | NT-7      | AGTTTCCACTCAGGC  | ENSG00000162739 | SLAMF6  |
| A0866 | anti-human CLEC1B (CLEC2)          | AYP1      | TGCCAGTATCACGTA  | ENSG00000165682 | CLEC1B  |
| A0867 | anti-human CD94                    | DX22      | CTTTCCGGTCCCTACA | ENSG00000134539 | KLRD1   |
| A0868 | anti-human IgE                     | MHE-18    | GGATGTACCGCGTAT  | ENSG00000211891 | IGHE    |
| A0870 | anti-human CD150 (SLAM)            | A12 (7D4) | GTCATTGTATGTCTG  | ENSG00000117090 | SLAMF1  |
| A0871 | anti-human CD162                   | KPL-1     | ATATGTCAGAGCACC  | ENSG00000110876 | SELPLG  |
| A0872 | anti-human CD84                    | CD84.1.21 | CTCCCTAGTTCCCTTT | ENSG00000066294 | CD84    |
| A0894 | anti-human Ig light chain κ        | MHK-49    | AGCTCAGCCAGTATG  | ENSG00000211592 | IGKC    |
| A0896 | anti-human CD85j (ILT2)            | GHI/75    | CCTTGTGAGGCTATG  | ENSG00000104972 | LILRB1  |
| A0897 | anti-human CD23                    | EBVCS-5   | TCTGTATAACCGTCT  | ENSG00000104921 | FCER2   |
| A0898 | anti-human Ig light chain λ        | MHL-38    | CAGCCAGTAAGTCAC  |                 |         |
| A0902 | anti-human CD328 (Siglec-7)        | 6-434     | CTTAGCATTTCACTG  | ENSG00000168995 | SIGLEC7 |
| A0912 | anti-human GPR56                   | CG4       | GCCTAGTTTCCGTTT  | ENSG00000205336 | ADGRG1  |
| A0920 | anti-human CD82                    | ASL-24    | TCCCCTTCCGCTTT   | ENSG00000085117 | CD82    |
| A0923 | anti-human NKp80                   | 5D12      | TATAGTTCCTCTGTG  | ENSG00000150045 | KLRF1   |
| A0931 | anti-human CD131                   | 1C1       | CTGCATGAGACCAA   | ENSG00000100368 | CSF2RB  |
| A0935 | anti-human CD74                    | LN2       | CTGTAGCATTTCCCT  | ENSG00000019582 | CD74    |
| A0940 | anti-human CD116                   | 4H1       | ATGGACAGTTCGTGT  | ENSG00000198223 | CSF2RA  |
| A0941 | anti-human CD37                    | M-B371    | ACAGTCACTGGGCAA  | ENSG00000104894 | CD37    |
| A0944 | anti-human CD101 (BB27)            | BB27      | CTACTTCCCTGTCAA  | ENSG00000134256 | CD101   |
| A1018 | anti-human HLA-DR, DP, DQ          | Tü39      | AGCTACGAGCAGTAG  | ENSG00000204287 | HLA-DRA |
| A1046 | anti-human CD88 (C5aR)             | S5/1      | GCCGCATGAGAAACA  | ENSG00000197405 | C5AR1   |
|       | CD110                              | S16017E   | TGTTGTAAGATGCCA  | ENSG00000117400 |         |

|              |          |                  |                 |
|--------------|----------|------------------|-----------------|
| GP130        | 2E1B02   | CACGAGAATTTTCAGT | ENSG00000134352 |
| CD337        | P30-15   | AAAGTCACTCTGCCG  | ENSG00000204475 |
| CD271        | ME20.4   | AACCGCGCTTCAGAT  | ENSG00000064300 |
| CD34         | 581      | GCAGAAATCTCCCTT  | ENSG00000174059 |
| CD117        | 104D2    | AGACTAATAGCTGAC  | ENSG00000157404 |
| CD1d         | 51.1     | TCGAGTCGCTTATCA  | ENSG00000158473 |
| CD126        | UV4      | TGATGGGAGCTTATC  | ENSG00000160712 |
| CD307e       | 509f6    | TCACGCAGTCCTCAA  | ENSG00000143297 |
| CD307c/FcRL3 | H5/FcRL3 | GCCTAGTTTGAACGC  | ENSG00000160856 |

Supplementary Table 3

| Experiment | CUT&Tag (>100) | ADT/HTO (>10 / >10) | Doublets | Filtered Set |
|------------|----------------|---------------------|----------|--------------|
| H3K4me1    | 22,954         | 16,631              | 3,861    | 12,770       |
| H3K4me2    | 12,786         | 10,972              | 1,397    | 9,575        |
| H3K4me3    | 14,262         | 12,026              | 1,640    | 10,386       |
| H3K9me3    | 10,779         | 9,528               | 1,224    | 8,304        |
| H3K27ac    | 21,900         | 18,651              | 3,042    | 15,609       |
| H3K27me3   | 18,162         | 9,915               | 1,683    | 8,232        |
